# Supplementary material
Source: MDPI journal article supplement (https://www.mdpi.com/2071-1050/12/12/4984)
Supplement: s1 [file s1]

# The Citizens' Views on Adaptation to Bioclimatic Housing Design: Case Study from Greece

Veronika Andrea <sup>1</sup>, Stilianos Tampakis <sup>2\*</sup> Paraskevi Karanikola <sup>1</sup> and Maria Georgopoulou <sup>1</sup>

<sup>1</sup> Department of Forestry and Management of the Environment and Natural Resources, Democritus University of Thrace, 68200 Orestiada, Greece; vandrea@fmenr.duth.gr (V.A.); pkaranik@fmenr.duth.gr (P.K.); mar.georgopoulou@gmail.com (M.G.)

<sup>2</sup> School of Forestry and Natural Environment, Faculty of Agriculture, Forestry and Natural Environment, Aristotle University of Thessaloniki, 54124 Thessaloniki, Greece

\* Correspondence: stampaki@for.auth.gr; Tel.: +30 2310 992756

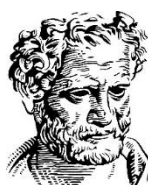

DEMOCRITUS UNIVERSITY OF THRACE

DEPARTMENT OF FORESTRY & MANAGEMENT OF THE ENVIRONMENT & NATURAL RESOURCES

Laboratory of Forest Policy tel. +30 2552041134

Dear Madam/Sir,

This questionnaire is a key research tool that will be utilized for the preparation of my master thesis. It aims to investigate your views on the adoption of bioclimatic housing design. The information you provide is strictly confidential and will only be used for research purposes. Please answer the following questions carefully and honestly.

## Questionnaire

**(1) Do you agree on the need to design buildings under the concept of bioclimatic design, meaning that their needs in the field of heating and cooling are covered with passive systems?**

Totally agree ☐ Agree ☐ Neither agree nor disagree ☐ Disagree ☐ Totally disagree ☐

**(2) Which side of your building is more important:**

**For the better utilization of the solar radiation (passive solar systems)**

North ☐ East ☐ South ☐ West ☐ I do not know ☐

**For the protection of winds and the heat which accumulates in the summer**

North ☐ East ☐ South ☐ West ☐ I do not know ☐

**(3) In which level have the following practices been adopted aiming to**

*(Evaluate the practices from 1 to 10, 1 is the lowest while 10 is the most used; in fact, you can give the same grade in more subjects).*

..... Insolation preservation during winter

..... Protection from strong winter winds

..... Minimization of the heating losses during winter

..... Protection from the summer sun

..... Take advantage of the summer breezes

..... Removal of the heat which accumulates in summer

**(4) The openings size (windows and doors) on the north-south axis in your house are:**

to the North wide ☐ average ☐ narrow ☐ do not exist ☐  
to the east wide ☐ average ☐ narrow ☐ do not exist ☐  
to the south wide ☐ average ☐ narrow ☐ do not exist ☐  
to the west wide ☐ average ☐ narrow ☐ do not exist ☐

**(5) Your interior space installations on the north-south axis are:**

Bedrooms North ☐ in the middle of the house ☐ South ☐ do not exist ☐  
Lining room North ☐ in the middle of the house ☐ South ☐ do not exist ☐  
Kitchen North ☐ in the middle of the house ☐ South ☐ do not exist ☐  
Dining room North ☐ in the middle of the house ☐ South ☐ do not exist ☐  
Toilet North ☐ in the middle of the house ☐ South ☐ do not exist ☐

**(6) Your house is:**

detached house ☐ on the first floor ☐ on the second floor ☐ on a higher floor ☐

**(7) Your house orientation on the north-south axis of the land upon which the building is situated is:**

North ☐ in the middle ☐ South ☐

**(8) Is there any garden in your house?** Yes ☐ No ☐ *If YES, please answer the following questions:*

**The size of your garden is:**

Larger than 300 m<sup>2</sup> ☐ 300–150 m<sup>2</sup> ☐ 150–50 m<sup>2</sup> ☐ 50–20 m<sup>2</sup> ☐ smaller than 20 m<sup>2</sup> ☐

**Number of trees in the garden.....** Evergreen ..... Deciduous

**Your garden orientation on the north-south axis on the land/plot is:**

North ☐ in the middle of the land/plot ☐ South ☐ around the land/plot ☐

**Most of the evergreen trees are planted in the land/plot in the...**

North side ☐ East side ☐ South side ☐ West side ☐

**Most of the deciduous trees are planted in the land/plot in the...**

North side ☐ East side ☐ South side ☐ West side ☐

**Which is the best season for you to relax in your garden?**

autumn ☐ winter ☐ spring ☐ summer ☐

**(9) Gender:** Male ☐ Female ☐

**(10) Age:** 18–30 ☐ 31–40 ☐ 41–50 ☐ > 50 ☐

**(11) Educational level:** I have not graduated from Primary School ☐ Primary School ☐  
Secondary School ☐ Technical School ☐ High School ☐ Technological Educational Institute ☐  
University ☐

**(12) Marital status:**

Unmarried ☐ Married ☐ Divorced or Widowed ☐

**Number of children:** .....

**(13) What is your main occupation?**

Private employee ☐ Farmer - Livestock farmer ☐ Laborer ☐  
Public Servant ☐ Student ☐ Housewife ☐

Freelancers ☐ Pensioner ☐ Unemployed ☐

**(14) If you want, we would like you to honestly report your gross annual income;**

Less than 5.000 € ☐ 5.001–10.000 € ☐ 10.001–20.000 € ☐ 20.001–30.000 € ☐  
☐ more than 30.000 € ☐ I do not answer ☐

**Thank you very much for your cooperation.**
